# Supplementary material for: Advanced paternal age directly impacts mouse embryonic placental imprinting
Source: PubMed Central journal article supplement (PMC7059926; doi:10.1371/journal.pone.0229904), 2020-03-06

## A) Male1 (Mouse #61)

## Embryonic placentas from paternal youth (5 months)

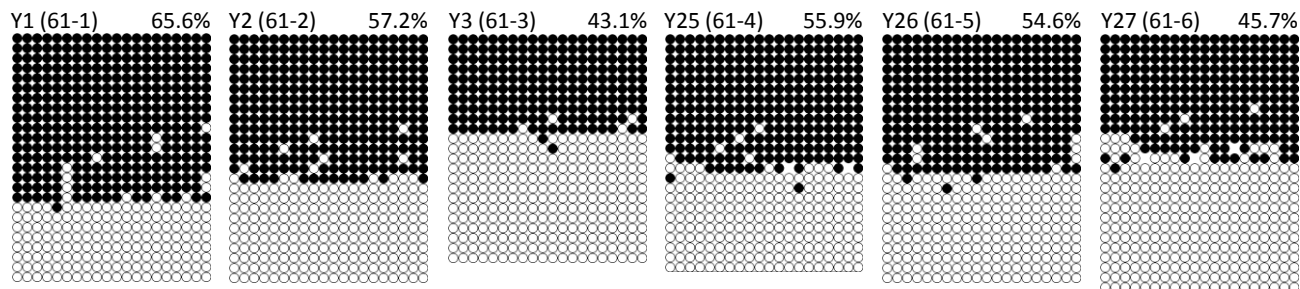

## Embryonic placentas from paternal aged (15 months)

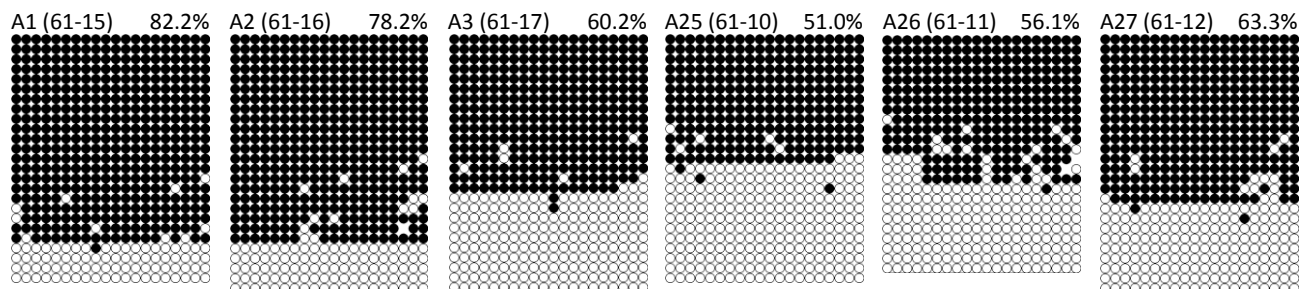

## B) Male2 (Mouse #18)

## Embryonic placentas from paternal youth (4 months)

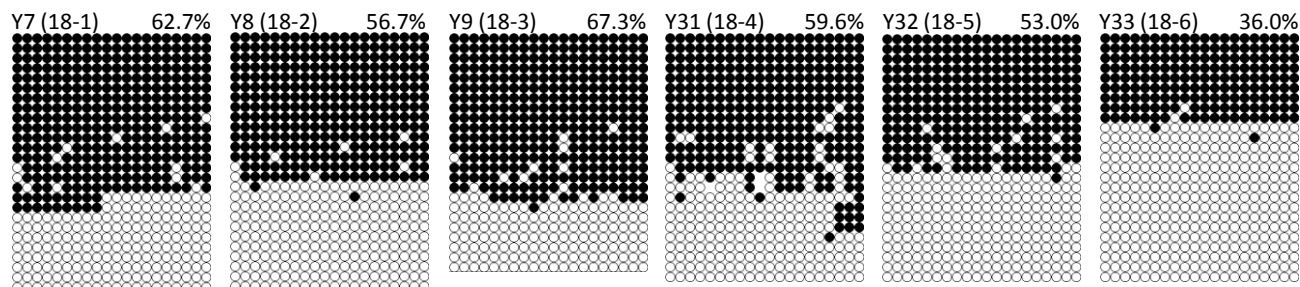

## Embryonic placentas from paternal aged (14 months)

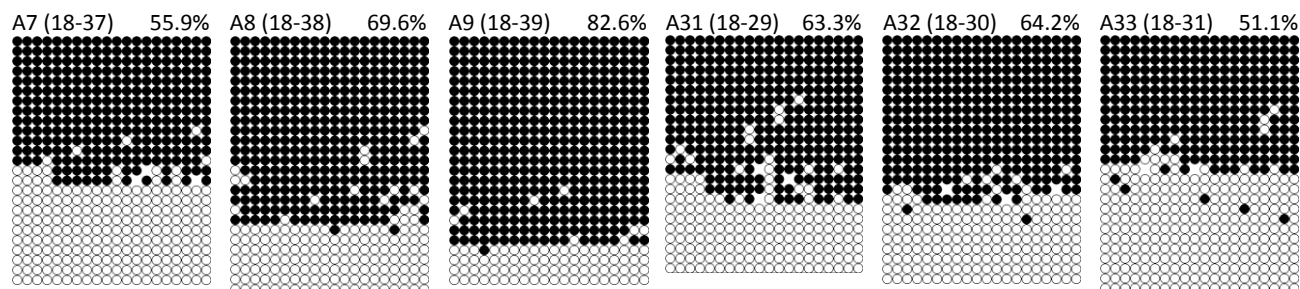

## C) Male3 (Mouse #116)

## Embryonic placentas from paternal youth (6 months)

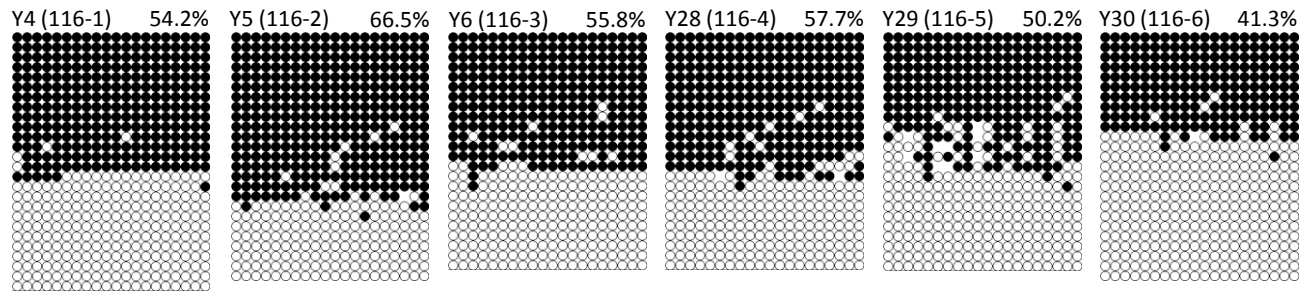

## Embryonic placentas from paternal aged (14 months)

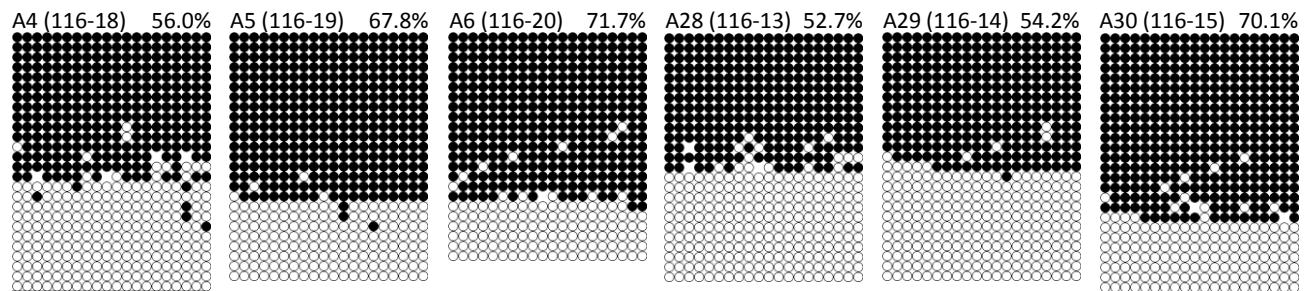

## D) Male4 (Mouse #83)

## Embryonic placentas from paternal youth (4 months)

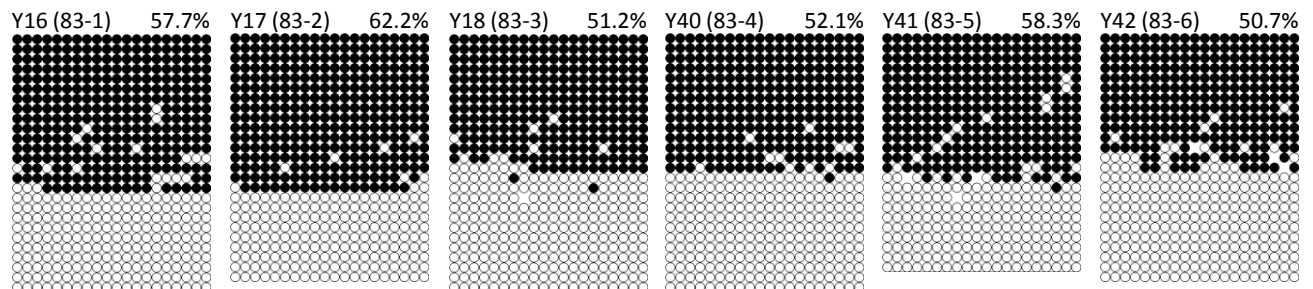

## Embryonic placentas from paternal aged (11 months)

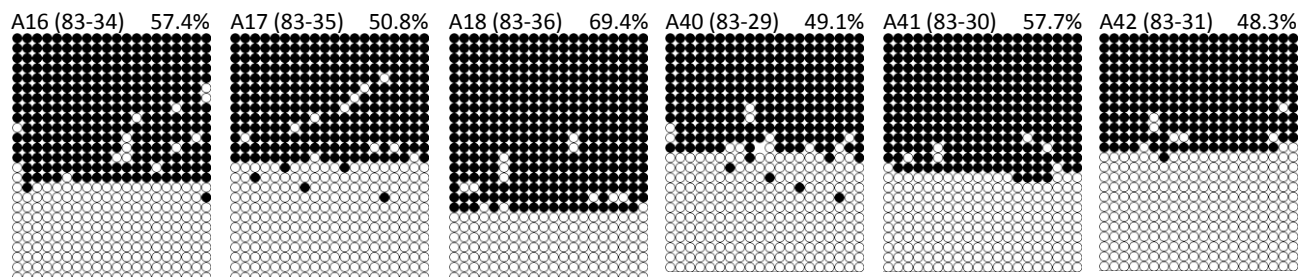

## E) Male5 (Mouse #90)

## Embryonic placentas from paternal youth (4 months)

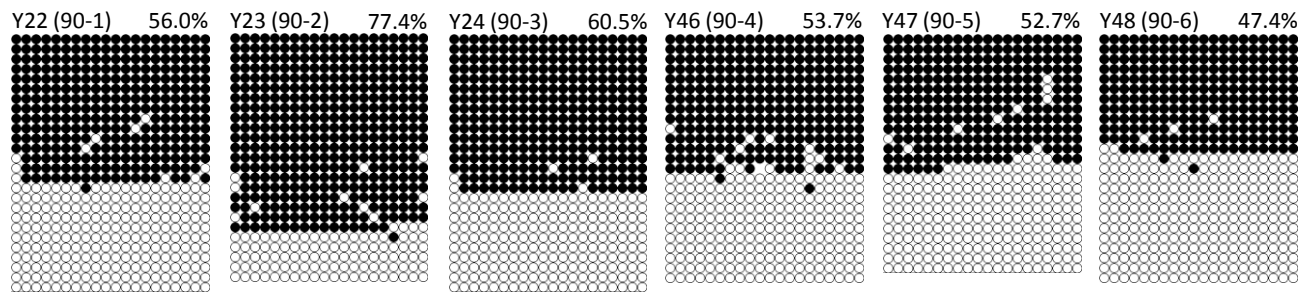

## Embryonic placentas from paternal aged (11 months)

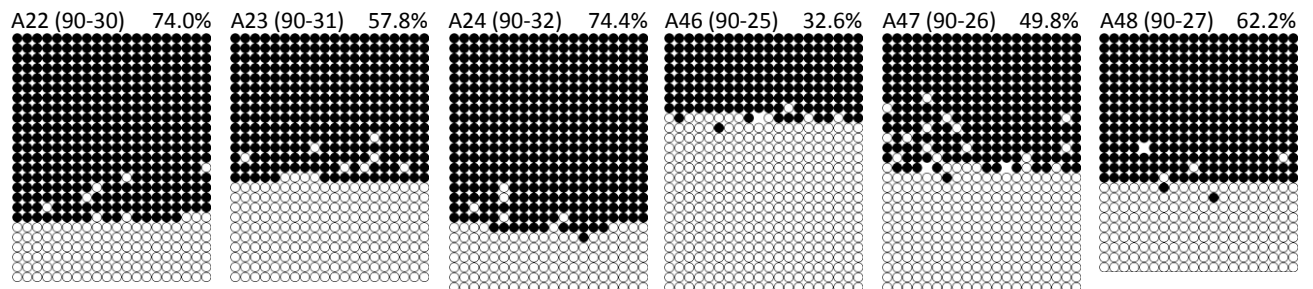

## F) Male6 (Mouse #112)

## Embryonic placentas from paternal youth (6 months)

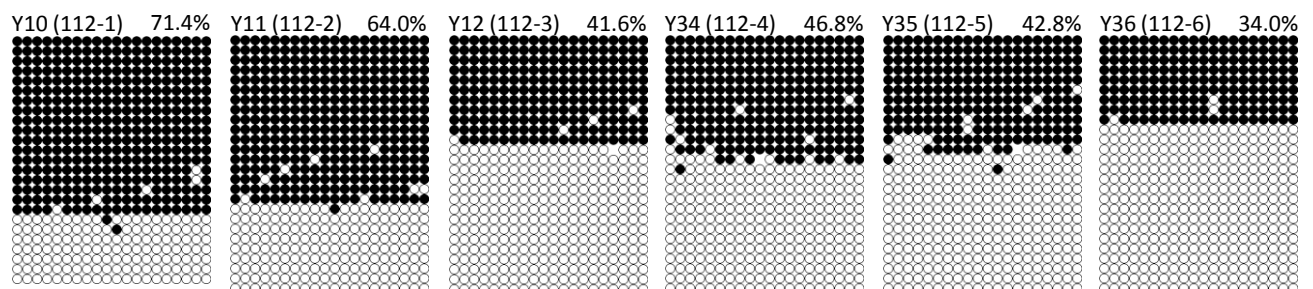

## Embryonic placentas from paternal aged (12 months)

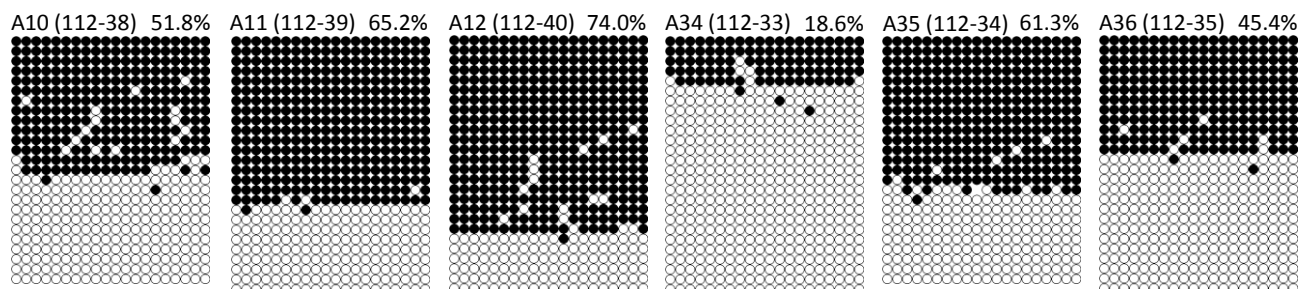

## G) Male7 (Mouse #53)

## Embryonic placentas from paternal youth (5 months)

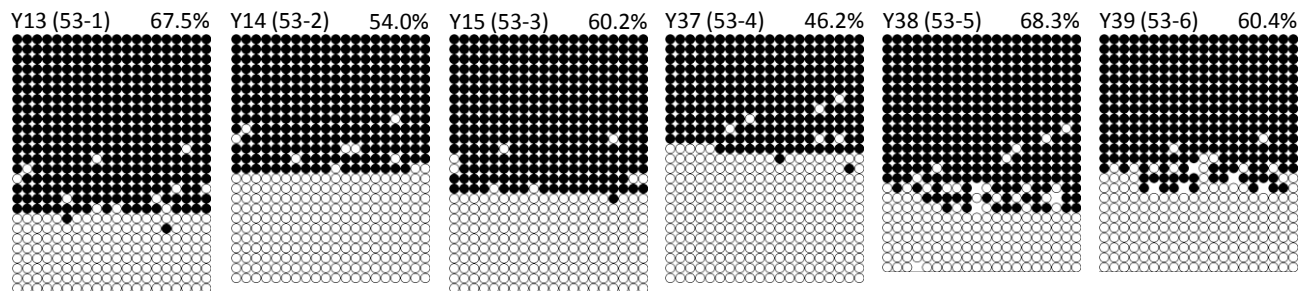

## Embryonic placentas from paternal aged (11 months)

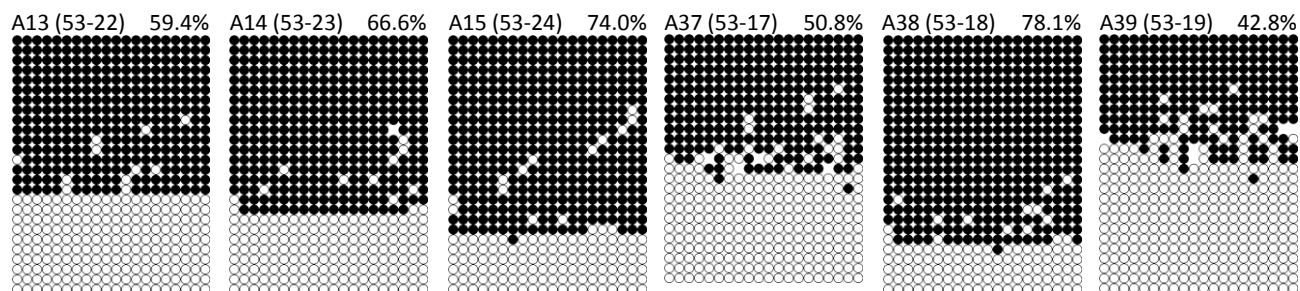

## H) Male8 (Mouse #81)

## Embryonic placentas from paternal youth (5 months)

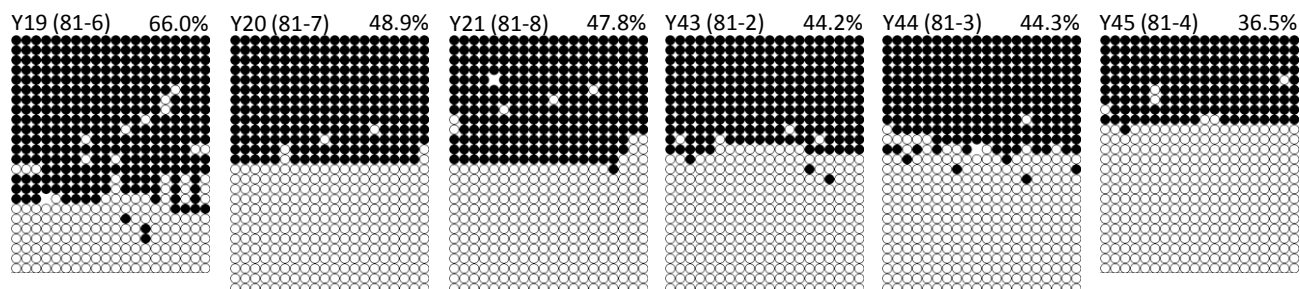

## Embryonic placentas from paternal aged (11 months)

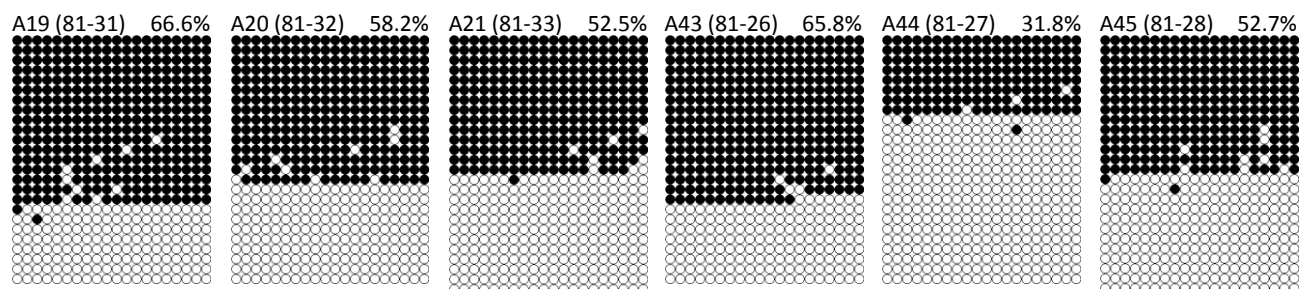

Supplement: pone.0229904.s001.pdf [file pone.0229904.s001.pdf]
